# Supplementary material for: Monodisperse hybrid microcapsules with an ultrathin shell of submicron thickness for rapid enzyme reactions
Source: Royal Society of Chemistry journal article supplement (doi:10.1039/c4tb01803f), 2014-11-19
Supplement: c4tb01803f1.pdf [file c4tb01803f1.pdf]

## Monodisperse hybrid microcapsules with ultrathin shell of submicron thickness for rapid enzyme reaction

Fang Wu,<sup>a</sup> Wei Wang,<sup>\*a</sup> Li Liu,<sup>a</sup> Xiao-Jie Ju,<sup>a</sup> Rui Xie,<sup>a</sup> Zhuang Liu,<sup>a</sup> and Liang-Yin Chu<sup>\*ab</sup>

<sup>a</sup> School of Chemical Engineering, Sichuan University, Chengdu, Sichuan, 610065, China  
E-mail: chuly@scu.edu.cn (L.-Y. Chu), wangwei512@scu.edu.cn (W. Wang); Tel & Fax: +86 28 8546 0682

<sup>b</sup> State Key Laboratory of Polymer Materials Engineering, and Collaborative Innovation Center for Biomaterials Science and Technology, Sichuan University, Chengdu, Sichuan, 610065, China

### Supplementary Figure S1

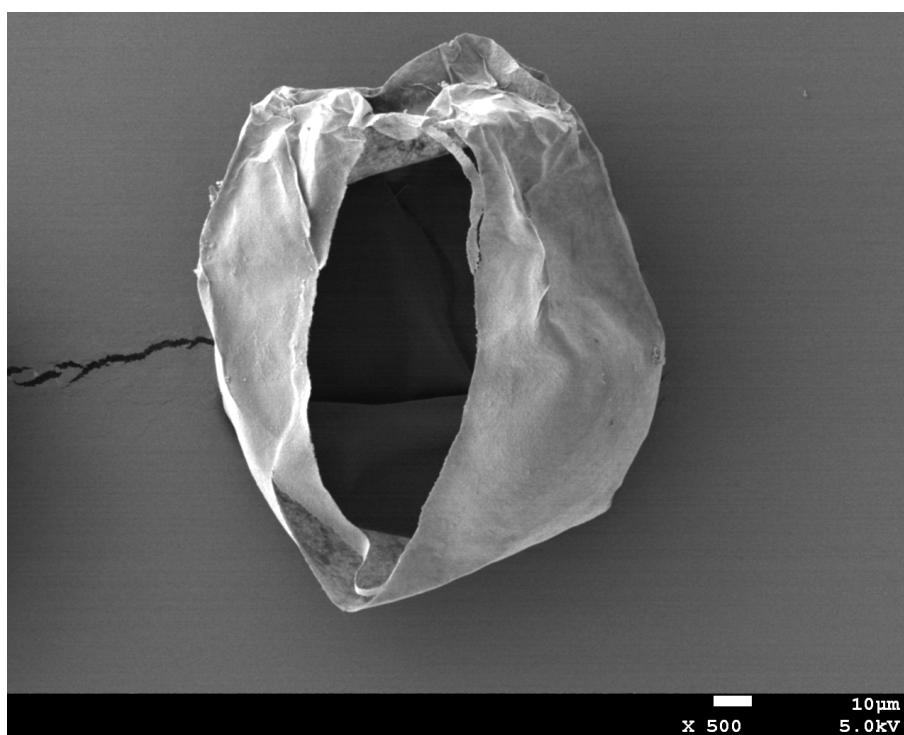

**Fig. S1.** SEM image of a ruptured APSi microcapsule after re-soaking in  $\text{CaCl}_2$  solution. Scale bar is 10  $\mu\text{m}$ .
